# Supplementary material for: Influenza H7N9 virus disrupts the monolayer human brain microvascular endothelial cells barrier in vitro
Source: Springer Nature journal article supplement (doi:10.1186/s12985-023-02163-3), 2023-09-29

VE-cadherin

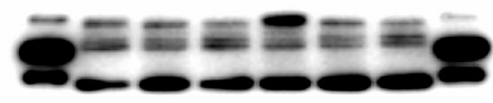

claudin-5

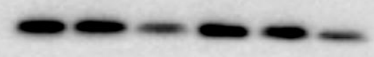

$\beta$ -actin

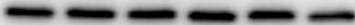

occludin

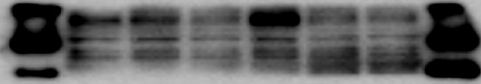

ZO-1

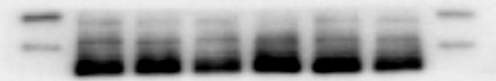

$\beta$ -actin

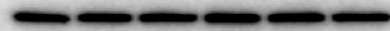

Supplement: MOESM1 [file 26105622]
